# Supplementary material
Source: Springer Nature journal article supplement (https://www.springermedizin.de/resource/supplementary/12987_2013_84_MOESM4_ESM.pdf/9680302)

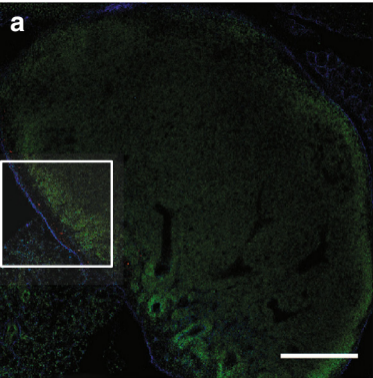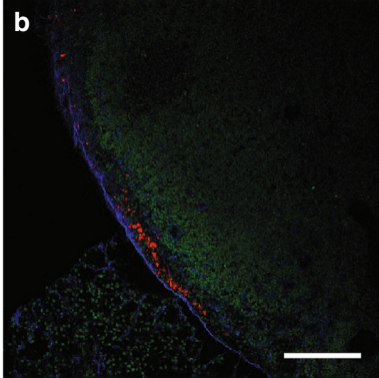

Supplement: MOESM4 [file 9680302]
